# Supplementary material for: The Hippo pathway effector YAP is an essential regulator of ductal progenitor patterning in the mouse submandibular gland
Source: eLife. 2017 May 11;6:e23499. doi: 10.7554/eLife.23499 (PMC5466420; doi:10.7554/eLife.23499)
Supplement: Figure 5—source data 1. — Differential expression analysis was performed on microarray data obtained from wild type and Yap-cnull E15.5 SMGs. Shown below are genes with a FDRq < 0.01 that exhibit a fold change of twofold or greater when data from Yap-cnull was compared wild type SMGs. Genes showing reduced expression in the Yap-cnull vs. WT (DOWN) are shown in the left two columns, and genes showing increased expression in the Yap-cnull vs. WT (UP) are shown in the right two columns. DOI: http://dx.doi.org/10.7554/eLife.23499.008 [file elife-23499-fig5-data1.xlsx]

## Sheet: Figure 5 - Source Data 1
Figure 5 - Source Data 1. Genes differentially expressed in Yap-cnull vs WT (FDRq<0.01; Fold change >2). Differential expression analysis was performed on microarray data obtained from wild type and Yap-cnull E15.5 SMGs. Shown below are genes with a FDRq <0.01 that exhibit a fold change of 2-fold or greater when data from Yap-cnull was compared wild type SMGs. Genes showing reduced expression in …
DOWN in Yap-cnull vs. WT	Fold Change		UP in Yap-cnull vs. WT	Fold Change
Chac1	-9.692		Bpifa2	12.7251
Sox2	-6.36044		Pip	10.582
Aldh3a1	-5.2		Crisp1	8.83902
Defb1	-4.8		4930539E08Rik	7.83437
Ereg	-4.62878		Sult1e1	7.65291
Slc7a3	-4.4258		Actg2	6.00887
Sostdc1	-4.3		Crispld2	5.55763
Arc	-4		Lpo	5.19771
Cyp2f2	-3.95528		BC048546	4.85481
Tmem132c	-3.7		Arg1	4.64712
Myc	-3.5		Oit1	4.42363
Yap	-3.36421		Wfdc12	4.29861
Kif26b	-3.23568		Reg3g	4.11203
Ucma	-3.18712		Maob	4.10094
Krt5	-3.14877		Mgp	3.98154
Fam189a2	-3.12279		LOC100861934	3.71692
Gm17501	-2.98333		Actc1	3.58195
Ctgf	-2.9		Smgc	3.50812
Grm7	-2.9		Ovol1	3.39306
Tmem171	-2.708		Lcn2	3.34592
Upk3a	-2.7		2410076l21Rik	3.2
Pgm5	-2.69031		Efhd1	2.91704
Tspan8	-2.58967		Sema3b	2.83792
Edn2	-2.58716		Ceacam1	2.83072
Fmod	-2.58593		Smr3a	2.80642
Plxdc1	-2.57024		Nts	2.80301
Enpp2	-2.53383		Sele	2.75686
Cbr2	-2.45368		Ppfibp2	2.64168
Krt15	-2.43467		Gpr155	2.53939
Krt14	-2.4		Pdlim3	2.52498
Vsnl1	-2.37599		Ttpa	2.52398
Cyr61	-2.33491		Fgg	2.45275
Igfbp5	-2.31416		Tuft1	2.44969
Rnd3	-2.3		Klf2	2.37825
Pltp	-2.28698		Snord14e	2.32342
Lgi2	-2.26374		St6galnac2	2.3164
Fgfbp1	-2.22272		Phactr1	2.29754
Mbd5	-2.19782		Svopl	2.2701
Thbd	-2.18121		Kit	2.25551
Rassf10	-2.18085		BC064078	2.22163
Ltbp2	-2.16066		Abhd2	2.20228
Egr2	-2.14643		Tnfrsf12a	2.19804
Rab38	-2.14203		Plbd1	2.17574
Axin2	-2.08261		Btg1	2.17025
Pdgfa	-2.06107		Gpcpd1	2.15759
Osr1	-2.05978		Catsper2	2.10827
Jub	-2.04733		Tnmd	2.08167
Ier2	-2.03123		Chn2	2.05116
Lhx8	-2.01554		Tnfrsf13c	2.04835
Dnm3os	-2.00235		Chodl	2.04586
			Atf7ip	2.04297
			Chi3l1	2.0258
			1700019D03Rik	2.02254
			Marveld2	2.00355
			Gadd45b	2.00034
