# Supplementary material for: The Hippo pathway effector YAP is an essential regulator of ductal progenitor patterning in the mouse submandibular gland
Source: eLife. 2017 May 11;6:e23499. doi: 10.7554/eLife.23499 (PMC5466420; doi:10.7554/eLife.23499)
Supplement: Figure 5—source data 2. — GSEA (version 2.2.1) was used to identify biological terms, pathways and processes that are coordinately up- or down-regulated within each pairwise comparison. The Entrez Gene identifiers of the human homologs of the genes interrogated by the array were ranked according to the t statistic computed between the Yap-cnull and wild-type groups. Mouse genes with multiple human homologs (or vice versa) were removed prior to ranking, so that the ranked list represents only those human genes that match exactly one mouse gene. This ranked list was then used to perform pre-ranked GSEA analyses (default parameters with random seed 1234) using the Entrez Gene versions of the Hallmark, Biocarta, KEGG, Reactome, Gene Ontology (GO), and transcription factor and microRNA motif gene sets obtained from the Molecular Signatures Database (MSigDB), version 5.0. DOI: http://dx.doi.org/10.7554/eLife.23499.009 [file elife-23499-fig5-data2.xlsx]

## Sheet: Sheet1
Figure 5 - Source Data 2. Gene Set Enrichment Analysis (GSEA) of genes differentially expressed in Yap-null versus WT SMGs. GSEA (version 2.2.1) was used to identify biological terms, pathways and processes that are coordinately up- or down-regulated within each pairwise comparison. The Entrez Gene identifiers of the human homologs of the genes interrogated by the array were ranked according to t…
Group	Gene Set Name	Gene Set Size	Enrichment Score (ES)	Normalized Enrichment Score (NES)	Nominal p value	FDR q value
GO Biological Process	ACTIVATION_OF_MAPK_ACTIVITY	39	-0.502185	-1.7303	0.00217391	0.149396
TF motif	V$IK3_01	199	-0.381071	-1.73746	0	0.150489
GO Biological Process	EPIDERMIS_DEVELOPMENT	56	-0.478989	-1.73076	0.0043956	0.152321
BioCarta pathway	BIOCARTA_PDGF_PATHWAY	29	-0.539519	-1.73862	0.00655022	0.152715
TF motif	V$FOXD3_01	184	-0.392264	-1.74114	0	0.15297
TF motif	V$SOX5_01	233	-0.379728	-1.73101	0	0.155943
BioCarta pathway	BIOCARTA_ERK_PATHWAY	26	-0.564557	-1.75063	0.0105932	0.155985
microRNA motif	GTTTGTT,MIR-495	221	-0.387924	-1.75333	0	0.155996
microRNA motif	TGTGTGA,MIR-377	179	-0.394184	-1.74181	0	0.156239
KEGG pathway	KEGG_BASAL_CELL_CARCINOMA	53	-0.529038	-1.89285	0	0.156258
GO Biological Process	POSITIVE_REGULATION_OF_CELL_CYCLE	16	-0.636806	-1.74438	0.0102669	0.156306
TF motif	V$SP3_Q3	223	-0.416303	-1.88095	0	0.15766
BioCarta pathway	BIOCARTA_CTCF_PATHWAY	22	-0.636284	-1.90279	0	0.157726
TF motif	V$EGR_Q6	244	-0.378028	-1.75513	0	0.157944
Reactome pathway	REACTOME_CYCLIN_E_ASSOCIATED_EVENTS_DURING_G1_S_TRANSITION_	52	-0.48792	-1.74472	0.00668151	0.16029
GO Biological Process	SULFUR_METABOLIC_PROCESS	35	-0.522247	-1.7197	0.00847458	0.160742
TF motif	V$E4F1_Q6	243	-0.383079	-1.75639	0	0.161307
microRNA motif	TCTAGAG,MIR-517	43	-0.495005	-1.76635	0.00449438	0.162991
microRNA motif	CAGTATT,MIR-200B,MIR-200C,MIR-429	428	-0.359623	-1.75651	0	0.166615
BioCarta pathway	BIOCARTA_NFAT_PATHWAY	47	-0.493241	-1.76791	0	0.167098
microRNA motif	CATGTAA,MIR-496	168	-0.399942	-1.77158	0	0.167157
GO Biological Process	NERVOUS_SYSTEM_DEVELOPMENT	334	-0.370439	-1.77856	0	0.169417
BioCarta pathway	BIOCARTA_WNT_PATHWAY	24	-0.568878	-1.75763	0.004158	0.170874
BioCarta pathway	BIOCARTA_ARF_PATHWAY	17	-0.689637	-1.9115	0.00201613	0.171092
GO Biological Process	NEGATIVE_REGULATION_OF_CELL_DIFFERENTIATION	25	-0.597702	-1.84558	0.00455581	0.171644
microRNA motif	TCTGATC,MIR-383	42	-0.549135	-1.92637	0	0.171649
TF motif	V$ZF5_01	209	-0.359407	-1.63242	0	0.172172
GO Biological Process	MORPHOGENESIS_OF_AN_EPITHELIUM	15	-0.608546	-1.63112	0.0251046	0.17219
GO Molecular Function	OXIDOREDUCTASE_ACTIVITY_ACTING_ON_THE_ALDEHYDE_OR_OXO_GROUP_OF_DONORSNAD_OR_NADP_AS_ACCEPTOR	15	-0.609472	-1.6298	0.0135135	0.172253
TF motif	V$E2F_Q6	207	-0.357907	-1.62462	0	0.172299
GO Biological Process	MRNA_METABOLIC_PROCESS	70	-0.468917	-1.77215	0	0.172954
KEGG pathway	KEGG_GLYCOSAMINOGLYCAN_BIOSYNTHESIS_CHONDROITIN_SULFATE	20	-0.544084	-1.62523	0.0307018	0.173305
GO Biological Process	REGULATION_OF_DNA_METABOLIC_PROCESS	39	-0.479419	-1.63444	0.0152174	0.173387
TF motif	AACYNNNNTTCCS_UNKNOWN	85	-0.40195	-1.63284	0.00234742	0.173437
TF motif	V$LXR_Q3	69	-0.419662	-1.62611	0.00917431	0.173944
KEGG pathway	KEGG_SPLICEOSOME	95	-0.406211	-1.63855	0.00222222	0.174117
GO Cellular Component	NUCLEOLAR_PART	17	-0.588265	-1.69649	0.0137931	0.174697
microRNA motif	CACTTTG,MIR-520G,MIR-520H	212	-0.357136	-1.62172	0	0.174728
TF motif	SGCGSSAAA_V$E2F1DP2_01	147	-0.371817	-1.63497	0	0.174753
microRNA motif	GTTAAAG,MIR-302B	61	-0.478763	-1.77962	0	0.175172
microRNA motif	AAGGGAT,MIR-188	69	-0.429153	-1.63901	0	0.175484
microRNA motif	TCTGATA,MIR-361	74	-0.420916	-1.64174	0.0140187	0.175489
GO Biological Process	TISSUE_DEVELOPMENT	113	-0.394284	-1.62618	0.00230415	0.175811
GO Biological Process	INDUCTION_OF_APOPTOSIS_BY_INTRACELLULAR_SIGNALS	22	-0.561913	-1.65817	0.00854701	0.176279
Reactome pathway	REACTOME_GABA_SYNTHESIS_RELEASE_REUPTAKE_AND_DEGRADATION	15	-0.603002	-1.63534	0.0193133	0.176364
TF motif	V$E2F1DP1_01	205	-0.372072	-1.67216	0	0.176902
TF motif	V$OCT1_Q6	224	-0.355029	-1.64226	0	0.176953
GO Biological Process	REGULATION_OF_TRANSCRIPTION_FROM_RNA_POLYMERASE_II_PROMOTER	257	-0.351373	-1.63938	0	0.177147
TF motif	V$SP1_Q2_01	222	-0.371755	-1.6759	0	0.177196
TF motif	V$E2F4DP2_01	205	-0.372072	-1.69723	0	0.17735
microRNA motif	CCTGAGT,MIR-510	38	-0.498296	-1.69961	0.00909091	0.177527
TF motif	V$E2F1DP2_01	205	-0.372072	-1.65888	0	0.178025
TF motif	V$E2F_02	205	-0.376265	-1.70122	0	0.178532
TF motif	V$AHRARNT_01	132	-0.39439	-1.66699	0.00223714	0.178895
Reactome pathway	REACTOME_PROCESSING_OF_CAPPED_INTRON_CONTAINING_PRE_MRNA	105	-0.402355	-1.6689	0	0.179131
GO Molecular Function	GTP_BINDING	42	-0.472718	-1.6423	0.0153173	0.179138
microRNA motif	CTACTAG,MIR-325	15	-0.61841	-1.67242	0.0131004	0.179403
GO Biological Process	MRNA_PROCESSING_GO_0006397	60	-0.493325	-1.84963	0	0.179539
microRNA motif	TTTGTAG,MIR-520D	307	-0.354014	-1.67641	0	0.179634
microRNA motif	ATAAGCT,MIR-21	108	-0.41109	-1.70299	0.00236407	0.179877
TF motif	V$LXR_DR4_Q3	81	-0.418923	-1.6543	0.00226244	0.180192
BioCarta pathway	BIOCARTA_IGF1_PATHWAY	19	-0.634237	-1.85897	0	0.180229
Reactome pathway	REACTOME_MRNA_3_END_PROCESSING	27	-0.534542	-1.65908	0.00665188	0.180432
microRNA motif	AAGCAAT,MIR-137	193	-0.404161	-1.81474	0	0.180753
Reactome pathway	REACTOME_PROCESSING_OF_CAPPED_INTRONLESS_PRE_MRNA	18	-0.593407	-1.67746	0.0127389	0.181334
GO Molecular Function	STRUCTURAL_CONSTITUENT_OF_CYTOSKELETON	47	-0.46477	-1.64234	0.00684931	0.181477
microRNA motif	TAGCTTT,MIR-9	217	-0.395971	-1.82005	0	0.18158
GO Biological Process	SULFUR_COMPOUND_BIOSYNTHETIC_PROCESS	18	-0.594199	-1.65182	0.0246914	0.181762
microRNA motif	CAAGGAT,MIR-362	59	-0.436656	-1.61532	0.0165631	0.182342
TF motif	V$E2F_Q4	211	-0.374183	-1.70388	0	0.182429
GO Molecular Function	PHOSPHATASE_REGULATOR_ACTIVITY	23	-0.590113	-1.78044	0.00208333	0.182535
TF motif	YTAAYNGCT_UNKNOWN	135	-0.388589	-1.65933	0.00231481	0.182661
microRNA motif	TGTATGA,MIR-485-3P	142	-0.390967	-1.67833	0	0.183396
microRNA motif	ACCAAAG,MIR-9	460	-0.336132	-1.6426	0	0.183605
microRNA motif	TATTATA,MIR-374	266	-0.344497	-1.61275	0.00247525	0.184446
microRNA motif	AGGTGCA,MIR-500	91	-0.402511	-1.64355	0.00470588	0.184474
microRNA motif	TTCCGTT,MIR-191	28	-0.531352	-1.6596	0.00858369	0.184801
TF motif	V$E2F4DP1_01	211	-0.369049	-1.66118	0	0.185094
KEGG pathway	KEGG_METABOLISM_OF_XENOBIOTICS_BY_CYTOCHROME_P450	36	-0.499371	-1.64438	0.00883002	0.185568
TF motif	V$E2F1DP1RB_01	204	-0.37286	-1.67858	0	0.186381
GO Biological Process	ECTODERM_DEVELOPMENT	62	-0.475675	-1.78814	0.00229358	0.186652
Reactome pathway	REACTOME_MRNA_SPLICING	79	-0.464278	-1.82361	0	0.187033
microRNA motif	ATCTTGC,MIR-31	68	-0.429143	-1.64474	0	0.187653
Reactome pathway	REACTOME_NEUROTRANSMITTER_RELEASE_CYCLE	31	-0.509652	-1.67986	0.0106157	0.187792
BioCarta pathway	BIOCARTA_P38MAPK_PATHWAY	34	-0.547434	-1.78244	0.00449438	0.187967
GO Molecular Function	PROTEIN_SERINE_THREONINE_PHOSPHATASE_ACTIVITY	22	-0.594255	-1.79203	0.00397614	0.188787
Reactome pathway	REACTOME_CLEAVAGE_OF_GROWING_TRANSCRIPT_IN_THE_TERMINATION_REGION_	32	-0.497745	-1.60859	0.0165094	0.18909
KEGG pathway	KEGG_COLORECTAL_CANCER	59	-0.44721	-1.64475	0.00425532	0.190275
GO Biological Process	REGULATION_OF_CELL_DIFFERENTIATION	51	-0.471162	-1.6804	0.00431035	0.190328
KEGG pathway	KEGG_WNT_SIGNALING_PATHWAY	141	-0.390715	-1.68496	0.00228833	0.190618
TF motif	V$E2F1_Q3_01	216	-0.375407	-1.68194	0	0.19154
microRNA motif	CAGTGTT,MIR-141,MIR-200A	288	-0.342792	-1.60552	0	0.191644
Reactome pathway	REACTOME_PREFOLDIN_MEDIATED_TRANSFER_OF_SUBSTRATE_TO_CCT_TRIC	20	-0.554217	-1.60103	0.0286976	0.19479
microRNA motif	ATGTACA,MIR-493	295	-0.340911	-1.60118	0	0.19655
microRNA motif	GCACCTT,MIR-18A,MIR-18B	107	-0.427068	-1.7927	0	0.198591
KEGG pathway	KEGG_GAP_JUNCTION	74	-0.410573	-1.59494	0.00888889	0.201617
microRNA motif	TTGGGAG,MIR-150	85	-0.45861	-1.82414	0	0.201628
KEGG pathway	KEGG_NICOTINATE_AND_NICOTINAMIDE_METABOLISM	20	0.707655	1.97261	0.00199601	0.203719
GO Biological Process	NEGATIVE_REGULATION_OF_TRANSCRIPTION_FROM_RNA_POLYMERASE_II_PROMOTER	68	-0.509913	-1.9351	0	0.207781
Reactome pathway	REACTOME_SIGNALING_BY_HIPPO	19	-0.638142	-1.79376	0.00421053	0.208871
Reactome pathway	REACTOME_KERATAN_SULFATE_KERATIN_METABOLISM	28	-0.504864	-1.58909	0.0167015	0.208874
microRNA motif	GTGCAAA,MIR-507	114	-0.381678	-1.58596	0.00457666	0.210215
microRNA motif	GTACTGT,MIR-101	233	-0.342786	-1.58613	0.00261097	0.211755
KEGG pathway	KEGG_INOSITOL_PHOSPHATE_METABOLISM	51	-0.433694	-1.56692	0.00888889	0.212975
BioCarta pathway	BIOCARTA_GLEEVEC_PATHWAY	22	-0.540699	-1.56561	0.033264	0.213104
microRNA motif	GTGTTGA,MIR-505	94	-0.387208	-1.56102	0.00888889	0.213715
microRNA motif	CTTGTAT,MIR-381	187	-0.350421	-1.56353	0	0.214633
GO Biological Process	CENTRAL_NERVOUS_SYSTEM_DEVELOPMENT	110	-0.378004	-1.56696	0.00225734	0.214654
GO Biological Process	CELLULAR_PROTEIN_COMPLEX_ASSEMBLY	30	-0.49208	-1.56122	0.0258065	0.215082
TF motif	V$CHX10_01	191	-0.34736	-1.56213	0.00234742	0.215346
TF motif	V$E2F1_Q3	219	-0.342026	-1.55903	0	0.215439
TF motif	V$E2F1_Q6_01	202	-0.351559	-1.57892	0	0.215451
GO Biological Process	POSITIVE_REGULATION_OF_RESPONSE_TO_STIMULUS	35	-0.469517	-1.57741	0.0173536	0.215928
TF motif	V$CEBP_01	240	-0.339107	-1.57594	0	0.216309
TF motif	V$E2F1_Q6	207	-0.34789	-1.567	0	0.216388
BioCarta pathway	BIOCARTA_CARDIACEGF_PATHWAY	16	-0.568776	-1.5792	0.0274262	0.216945
TF motif	V$HFH1_01	215	-0.343335	-1.5673	0	0.217772
microRNA motif	CACTGTG,MIR-128A,MIR-128B	308	-0.330989	-1.57987	0	0.218084
GO Cellular Component	CHROMATIN_REMODELING_COMPLEX	16	-0.569215	-1.55508	0.0457516	0.218375
Reactome pathway	REACTOME_SYNTHESIS_SECRETION_AND_INACTIVATION_OF_GLP1	15	0.724933	1.91466	0.00180505	0.218391
microRNA motif	AGCACTT,MIR-93,MIR-302A,MIR-302B,MIR-302C,MIR-302D,MIR-372,MIR-373,MIR-520E,MIR-520A,MIR-526B,MIR-520B,MIR-520C,MIR-520D	308	-0.327668	-1.53894	0	0.218759
BioCarta pathway	BIOCARTA_PTDINS_PATHWAY	20	-0.536546	-1.53952	0.027957	0.21953
microRNA motif	TACGGGT,MIR-99A,MIR-100,MIR-99B	22	-0.521248	-1.55539	0.0367171	0.219536
microRNA motif	AATGTGA,MIR-23A,MIR-23B	379	-0.323708	-1.56736	0	0.219537
TF motif	V$AREB6_02	231	-0.336893	-1.54015	0	0.220109
TF motif	V$HFH8_01	175	-0.350827	-1.54288	0.005	0.220261
GO Molecular Function	MRNA_BINDING	18	-0.544911	-1.54371	0.0403587	0.220528
TF motif	V$SMAD_Q6	218	-0.345785	-1.56879	0	0.220748
TF motif	V$CDX2_Q5	216	-0.338367	-1.54049	0	0.220984
Reactome pathway	REACTOME_KERATAN_SULFATE_BIOSYNTHESIS	24	-0.517735	-1.54736	0.0232558	0.221212
BioCarta pathway	BIOCARTA_IL2RB_PATHWAY	35	-0.469653	-1.56739	0.0178971	0.221335
GO Biological Process	BRAIN_DEVELOPMENT	44	-0.436953	-1.54617	0.0139535	0.221384
TF motif	V$IK2_01	238	-0.334629	-1.53441	0	0.221883
microRNA motif	TACTTGA,MIR-26A,MIR-26B	271	-0.327638	-1.54378	0.00247525	0.222084
microRNA motif	GTATTAT,MIR-369-3P	178	-0.353467	-1.54073	0.00721154	0.222128
TF motif	V$FOXO3_01	218	-0.336361	-1.53303	0.00251889	0.222287
microRNA motif	TTTGCAC,MIR-19A,MIR-19B	472	-0.317271	-1.55187	0	0.222392
Reactome pathway	REACTOME_YAP1_AND_WWTR1_TAZ_STIMULATED_GENE_EXPRESSION	23	-0.5171	-1.55081	0.0214133	0.222469
TF motif	V$SOX9_B1	213	-0.337601	-1.54436	0	0.222621
KEGG pathway	KEGG_PATHWAYS_IN_CANCER	309	-0.329311	-1.57126	0	0.222625
TF motif	CCCNNGGGAR_V$OLF1_01	279	-0.33953	-1.56882	0	0.222692
microRNA motif	AGTCTAG,MIR-151	21	-0.534643	-1.56999	0.0376106	0.222728
microRNA motif	TCCAGAG,MIR-518C	110	-0.373318	-1.5474	0.00699301	0.222855
TF motif	CRGAARNNNNCGA_UNKNOWN	42	-0.443202	-1.53538	0.0238095	0.223226
GO Biological Process	POSITIVE_REGULATION_OF_TRANSFERASE_ACTIVITY	77	-0.393551	-1.53449	0.011655	0.223291
BioCarta pathway	BIOCARTA_NGF_PATHWAY	15	-0.595114	-1.54909	0.026694	0.22345
microRNA motif	GTACAGG,MIR-486	51	-0.539739	-1.96476	0	0.223737
BioCarta pathway	BIOCARTA_ALK_PATHWAY	34	-0.456042	-1.53019	0.0273349	0.224014
GO Molecular Function	GUANYL_NUCLEOTIDE_BINDING	43	-0.447641	-1.54762	0.0200893	0.224153
TF motif	V$CDC5_01	216	-0.335023	-1.53072	0	0.224555
TF motif	GGGNRMNNYCAT_UNKNOWN	71	-0.401395	-1.52558	0.0288248	0.228772
microRNA motif	ACTTTAT,MIR-142-5P	264	-0.326424	-1.52598	0	0.22958
TF motif	V$FREAC7_01	164	-0.348171	-1.52141	0	0.232757
TF motif	V$MAZR_01	196	-0.336078	-1.52171	0.00246305	0.233734
TF motif	V$HNF3_Q6	167	-0.342278	-1.51796	0.00232558	0.235344
KEGG pathway	KEGG_TGF_BETA_SIGNALING_PATHWAY	76	-0.396018	-1.51841	0.013544	0.236109
Reactome pathway	REACTOME_MAPK_TARGETS_NUCLEAR_EVENTS_MEDIATED_BY_MAP_KINASES	26	-0.480348	-1.51225	0.0315789	0.238933
BioCarta pathway	BIOCARTA_IGF1R_PATHWAY	19	-0.529229	-1.51449	0.0517241	0.239578
TF motif	V$AHRARNT_02	15	-0.569888	-1.5134	0.0669456	0.239948
TF motif	WGGAATGY_V$TEF1_Q6	330	-0.316281	-1.5124	0	0.240157
GO Molecular Function	CHEMOKINE_ACTIVITY	25	0.614914	1.87107	0.00188324	0.242585
GO Biological Process	RNA_SPLICING	70	-0.393382	-1.49595	0.00881057	0.243285
BioCarta pathway	BIOCARTA_IGF1MTOR_PATHWAY	19	-0.529975	-1.50767	0.0573951	0.243444
TF motif	GGAMTNNNNNTCCY_UNKNOWN	105	-0.366855	-1.50802	0.0136986	0.244387
Reactome pathway	REACTOME_SIGNALING_BY_NOTCH1	60	-0.402269	-1.50612	0.0288889	0.244608
GO Biological Process	REGULATION_OF_ORGANELLE_ORGANIZATION_AND_BIOGENESIS	35	-0.447878	-1.49597	0.0327103	0.244632
microRNA motif	TGCTTTG,MIR-330	284	-0.321968	-1.50406	0	0.244949
TF motif	V$AHR_Q5	190	-0.335628	-1.50493	0.00236967	0.245165
BioCarta pathway	BIOCARTA_TFF_PATHWAY	17	-0.541735	-1.49611	0.0569476	0.245799
GO Molecular Function	GLUTAMATE_RECEPTOR_ACTIVITY	16	-0.549879	-1.49666	0.0466102	0.246297
GO Cellular Component	INTERMEDIATE_FILAMENT_CYTOSKELETON	17	-0.535402	-1.49954	0.0678337	0.246983
microRNA motif	ACCATTT,MIR-522	138	-0.348674	-1.49673	0.00737101	0.247644
microRNA motif	ATTCTTT,MIR-186	234	-0.325409	-1.49983	0	0.247932
TF motif	V$ER_Q6_02	219	-0.329144	-1.49811	0	0.248042
microRNA motif	GCAAAAA,MIR-129	158	-0.346031	-1.50041	0	0.248442
TF motif	V$E2F_Q3	205	-0.329256	-1.49673	0.00249377	0.249092
GO Biological Process	FEMALE_PREGNANCY	31	-0.470537	-1.50063	0.0332594	0.249557
GO Biological Process	POSITIVE_REGULATION_OF_MAP_KINASE_ACTIVITY	44	-0.427008	-1.49053	0.0255864	0.249903
